# Supplementary material
Source: PubMed Central journal article supplement (PMC3192871)
Supplement: NIHMS61864-supplement-si20061122_023.pdf [file NIHMS61864-supplement-si20061122_023.pdf]

# Supporting Information

## Screening of 5-HT<sub>1A</sub> Receptor Antagonists using Molecularly Imprinted Polymers

Naphtali A. O'Connor<sup>†</sup>, David A. Paisner<sup>†</sup>, Donna Huryn<sup>‡</sup>, Kenneth J. Shea<sup>\*,†</sup>

<sup>†</sup> Department of Chemistry, University of California, Irvine, 92717

<sup>‡</sup> Department of Chemistry, University of Pennsylvania, 19104-6323

Ref. 28:

Fletcher, A.; Forster, E. A.; Bill, D. J.; Cliffe, I. A.; Hartley, J. E.; Jones, D. E.; McLenacha, A.; Stanhope, K. J.; Critchley, D. J.; Childs, K. J.; Middlefell, V. C.; Lanfumey, L.; Corradetti, R.; Laporte, A. M.; Gozlan, H.; Hamon, M.; Dourish, C. T., *Behav. Brain. Res.* **1996**, 73, 337-353.

**Table S1.** Data for binding isotherm of **P(WAY)**, **P(BA)** and **P(BL)**.

| <b>P(WAY)</b> |           | <b>P(BA)</b> |           | <b>P(BL)</b> |           |
|---------------|-----------|--------------|-----------|--------------|-----------|
| Bound (mM)    | Free (mM) | Bound (mM)   | Free (mM) | Bound (mM)   | Free (mM) |
| 0.39          | 1.47      | 0.29         | 1.57      | 0.31         | 1.55      |
| 0.36          | 1.27      | 0.28         | 1.35      | 0.29         | 1.34      |
| 0.30          | 0.92      | 0.24         | 0.98      | 0.24         | 0.98      |
| 0.24          | 0.76      | 0.18         | 0.82      | 0.19         | 0.81      |
| 0.22          | 0.56      | 0.18         | 0.6       | 0.18         | 0.6       |
| 0.19          | 0.38      | 0.15         | 0.42      | 0.15         | 0.42      |
| 0.14          | 0.26      | 0.11         | 0.29      | 0.12         | 0.28      |
| 0.09          | 0.14      | 0.07         | 0.16      | 0.08         | 0.15      |
| 0.07          | 0.07      | 0.054        | 0.086     | 0.057        | 0.083     |
